# Supplementary material for: Conservation of the three-dimensional structure in non-homologous or unrelated proteins
Source: Springer Nature journal article supplement (doi:10.1186/1479-7364-6-10), 2012-08-02
Supplement: 40246_2012_14_MOESM2_ESM.pdf [file 40246_2012_14_MOESM2_ESM.pdf]

| PDB # - Function                                                                                                                                                                                                                                                                                                           | RMSD - % Identity                    | Images from PyMOL and Cn3D                                                         |                                                                                     | References     |
|----------------------------------------------------------------------------------------------------------------------------------------------------------------------------------------------------------------------------------------------------------------------------------------------------------------------------|--------------------------------------|------------------------------------------------------------------------------------|-------------------------------------------------------------------------------------|----------------|
| <p><b>Example 1</b></p> <ul style="list-style-type: none"> <li>- 2GTL_Chain A: <i>Lumbricus terrestris</i> (annelide) hemoglobin part of a 3.6million Dalton protein. Transports oxygen.</li> <li>- 1H97_Chain A: <i>Paramphistomum epiclitum</i> (trematode) monomeric hemoglobin. High affinity to oxygen.</li> </ul>    | <p>RMSD: 2.3<br/>Identity: 12.1%</p> | 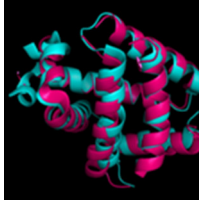   |    | <p>24, 25</p>  |
| <p><b>Example 2</b></p> <ul style="list-style-type: none"> <li>- 2GNW_Chain B: Found in plants. Its role is not yet determined. <i>Oryza sativa</i>.</li> <li>- 2W31_Chain A: detects oxygen and transmits signal. <i>Geobacter sulfurreducens</i>.</li> </ul>                                                             | <p>RMSD: 3.2<br/>Identity: 13.4%</p> |   |   | <p>27, 26</p>  |
| <p><b>Example 3</b></p> <ul style="list-style-type: none"> <li>- 2GLN_Chain A: nitric oxide scavenging. <i>Mycobacterium tuberculosis</i>.</li> <li>- 2ZS1_Chain A: extracellular giant Hb. Cooperative oxygen binding via inorganic cations. <i>Oligobrachia mashikoi</i>.</li> </ul>                                     | <p>RMSD: 2.4<br/>Identity: 6.7%</p>  |   |   | <p>28, 29,</p> |
| <p><b>Example 4</b></p> <ul style="list-style-type: none"> <li>- 1KN1_Chain A: allophycocyanin, absorbs light, part of phycobilisomes and phycobilisome structural family. <i>Pyropia yezoensis</i>.</li> <li>- 2BNL_Chain C: Non heme, regulates s factor after environmental stress. <i>Bacillus subtilis</i></li> </ul> | <p>RMSD: 2.9<br/>Identity: 11.4%</p> |   |   | <p>30, 31</p>  |
| <p><b>Example 5</b></p> <ul style="list-style-type: none"> <li>- 2VEB_Chain A: Found in archae, role is not yet determined. <i>Methanosarcina acetivorans</i>.</li> <li>- 1OJ6_Chain A: A neuroglobin found in human brain. Binds to oxygen. <i>Homo sapiens</i>.</li> </ul>                                               | <p>RMSD: 2.9<br/>Identity: 12.7%</p> |  |  | <p>32, 33</p>  |
