# Supplementary material for: Conservation of the three-dimensional structure in non-homologous or unrelated proteins
Source: Springer Nature journal article supplement (doi:10.1186/1479-7364-6-10), 2012-08-02
Supplement: 40246_2012_14_MOESM5_ESM.pdf [file 40246_2012_14_MOESM5_ESM.pdf]

| PDB # - Function                                                                                                                                                                                                                            | RMSD - % identity                    | Images from PyMOL and Cn3D                                                          | References    |
|---------------------------------------------------------------------------------------------------------------------------------------------------------------------------------------------------------------------------------------------|--------------------------------------|-------------------------------------------------------------------------------------|---------------|
| <p><b>Example 1</b></p> <ul style="list-style-type: none"> <li>- 1BH8_Chain B: TATA binding protein associated factor (TAF)II28 in <i>Homo sapiens</i></li> <li>- 1A7W: Histone HmfB from archaea <i>Methanothermus fervidus</i></li> </ul> | <p>RMSD: 1.0<br/>Identity: 22.6%</p> | 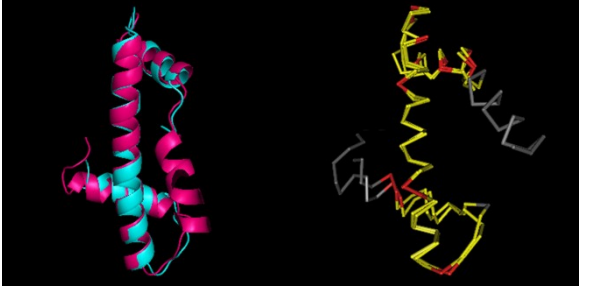   | <p>37, 69</p> |
| <p><b>Example 2</b></p> <ul style="list-style-type: none"> <li>- 3R45_Chain A: Histone H3-like centromeric protein A in <i>Homo sapiens</i></li> <li>- 1B6W: Histone HmfA from archaea <i>Methanothermus fervidus</i></li> </ul>            | <p>RMSD: 1.1<br/>Identity: 24.6%</p> |   | <p>37, 70</p> |
| <p><b>Example 3</b></p> <ul style="list-style-type: none"> <li>- 3AFA_Chain E: Histone 3 in <i>Homo sapiens</i></li> <li>- 1H3O_Chain D: Transcription Initiation Factor (TFIID) in <i>Homo sapiens</i></li> </ul>                          | <p>RMSD: 1.0<br/>Identity: 12.3%</p> |   | <p>71, 72</p> |
| <p><b>Example 4</b></p> <ul style="list-style-type: none"> <li>- 2JSS: Yeast (<i>Saccharomyces cerevisiae</i>) Histone H2A/H2B</li> <li>- 1Q9C: Double histone fold of <i>Homo sapiens</i> Son of sevenless (hSos)</li> </ul>               | <p>RMSD: 1.9<br/>Identity: 22.7%</p> |  | <p>73, 74</p> |
