# Supplementary material for: Conservation of the three-dimensional structure in non-homologous or unrelated proteins
Source: Springer Nature journal article supplement (doi:10.1186/1479-7364-6-10), 2012-08-02
Supplement: 40246_2012_14_MOESM7_ESM.pdf [file 40246_2012_14_MOESM7_ESM.pdf]

| PDB # - Function                                                                                                                                                                                                                                                                                                                               | RMSD - % Identity                    | Images from PyMOL and Cn3D                                                         |                                                                                     | References                                                         |
|------------------------------------------------------------------------------------------------------------------------------------------------------------------------------------------------------------------------------------------------------------------------------------------------------------------------------------------------|--------------------------------------|------------------------------------------------------------------------------------|-------------------------------------------------------------------------------------|--------------------------------------------------------------------|
| <p><b>Example 1</b></p> <ul style="list-style-type: none"> <li>- 1Q1H_Chain A: The alpha subunit of transcription factor TFIIE homolog from archae <i>Sulfolobus solfataricus</i>.</li> <li>- 1RUN_Chain A: DNA binding domain of <i>Escherichia coli</i> regulatory proteins which belongs to catabolite activator protein family.</li> </ul> | <p>RMSD: 1.0<br/>Identity: 22.7%</p> | 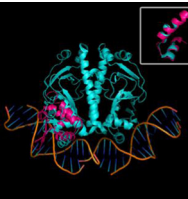   |    | <p>47, 48</p>                                                      |
| <p><b>Example 2</b></p> <ul style="list-style-type: none"> <li>- 1D1L_Chain A: Cro repressor of <i>Enterobacteria phage lambda</i>.</li> <li>- 3JRH_Chain B: <i>Escherichia coli</i> protein from Fis family which binds to unspecific DNA.</li> </ul>                                                                                         | <p>RMSD: 2.0<br/>Identity: 21.4%</p> |   |   | <p>50, 49</p>                                                      |
| <p><b>Example 3</b></p> <ul style="list-style-type: none"> <li>- 1R1T_Chain A: Negatively allogeostic regulated DNA binding of SmtB protein in presence of metals. <i>Synechococcus elongatus</i>.</li> <li>- 1ZLK_Chain A: Hypoxia – induced DosR protein. <i>Mycobacterium tuberculosis</i>.</li> </ul>                                      | <p>RMSD: 1.5<br/>Identity: 20.5%</p> |   |   | <p>51, 52</p>                                                      |
| <p><b>Example 4</b></p> <ul style="list-style-type: none"> <li>- 1RES_Chain A: DNA-binding domains of <i>Escherichia coli</i> <math>\gamma\delta</math> resolvase.</li> <li>- 1Z9C_Chain F: Chimeric winged helix-turn-helix (wHTH) DNA-binding domain of OhrR-ohrA complex. <i>Bacillus subtilis</i>.</li> </ul>                              | <p>RMSD: 1.4<br/>Identity: 10.7%</p> |   |   | <p>53, 54</p>                                                      |
| <p><b>Example 5</b></p> <ul style="list-style-type: none"> <li>- 3OIO_Chain A: Bacterial regulatory helix-turn-helix proteins of AraC family from <i>Chromobacterium violaceum</i>.</li> <li>- 1XS9_Chain A: MarA <i>Escherichia coli</i> regulatory helix-turn-helix protein that binds DNA as a monomer.</li> </ul>                          | <p>RMSD: 2.2<br/>Identity: 20.7%</p> |  |  | <p><sup>55</sup> Chang et al., deposited in PDB, not published</p> |
