# Supplementary material for: Conservation of the three-dimensional structure in non-homologous or unrelated proteins
Source: Springer Nature journal article supplement (doi:10.1186/1479-7364-6-10), 2012-08-02
Supplement: 40246_2012_14_MOESM9_ESM.pdf [file 40246_2012_14_MOESM9_ESM.pdf]

| PDB # - Function                                                                                                                                                                                                                                                                                                                                 | RMSD - % Identity                    | Images from PyMOL and Cn3D                                                           | References                                                         |
|--------------------------------------------------------------------------------------------------------------------------------------------------------------------------------------------------------------------------------------------------------------------------------------------------------------------------------------------------|--------------------------------------|--------------------------------------------------------------------------------------|--------------------------------------------------------------------|
| <p><b>Example 1</b></p> <ul style="list-style-type: none"> <li>- 1YUJ_Chain A: structure of DNA binding domain of the GAGA factor(DNA binding protein) <i>Drosophila melanogaster</i></li> <li>- 2D9H_Chain A: forth and fifth zf-C2H2 domains of zinc finger protein 692(DNA binding protein). <i>Homo sapiens</i></li> </ul>                   | <p>RMSD: 0.8<br/>Identity:16.0%</p>  | 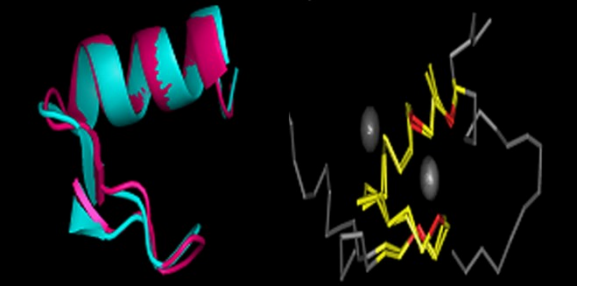    | <p><sup>59</sup> Zhang et al., deposited in PDB, not published</p> |
| <p><b>Example 2</b></p> <ul style="list-style-type: none"> <li>- 3ODC_Chain B: Human zinc finger 2. Binds to DNA. <i>Homo sapiens</i>.</li> <li>- 1MHZ_Chain D: hydroxylase component of methane monooxygenase. No evidence that binds to DNA. <i>Methylosinus trichosporium</i>.</li> </ul>                                                     | <p>RMSD: 1.5<br/>Identity: 3%</p>    |    | <p>60, 61</p>                                                      |
| <p><b>Example 3</b></p> <ul style="list-style-type: none"> <li>- 1MHZ_Chain D: hydroxylase component of methane monooxygenase <i>Methylosinus trichosporium</i></li> <li>- 2INC_Chain A: Native Toluene/o-xylene Monooxygenase Hydroxylase <i>Pseudomonas stutzeri</i></li> </ul>                                                                | <p>RMSD: 2.4<br/>Identity: 21.0%</p> |    | <p>60, 62</p>                                                      |
| <p><b>Example 4</b></p> <ul style="list-style-type: none"> <li>- 1U85_Chain A: tryptophan-containing CCHH zinc finger-Kruppel like factor 3-DNA binding protein. <i>Mus musculus</i></li> <li>- 1UBD_Chain C: Human YY1 zinc finger domain which binds to DNA. <i>Homo sapiens</i>.</li> </ul>                                                   | <p>RMSD: 1.0<br/>Identity: 15.8%</p> |   | <p>Cram et al., deposited in PDB, not published <sup>63</sup></p>  |
| <p><b>Example 5</b></p> <ul style="list-style-type: none"> <li>- 2VY4_Chain A: A splicing protein which Binds the 5 Splice Site of U12-Type intron. <i>Homo sapiens</i>.</li> <li>- 3MHH_Chain C: Transcriptional coactivator complex;has multiple roles on role in deubiquitination of histone H2B. <i>Saccharomyces cerevisiae</i>.</li> </ul> | <p>RMSD: 1.2<br/>Identity: 23.1%</p> |  | <p>64, 75</p>                                                      |
