# Supplementary figures and images for: Conservation of the three-dimensional structure in non-homologous or unrelated proteins
Source: Springer Nature journal article supplement (doi:10.1186/1479-7364-6-10), 2012-08-02

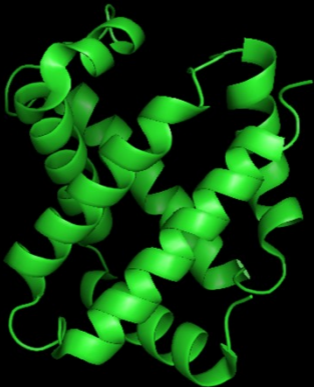

Supplement: 40246_2012_14_MOESM1_ESM.pdf [file 40246_2012_14_MOESM1_ESM.pdf]

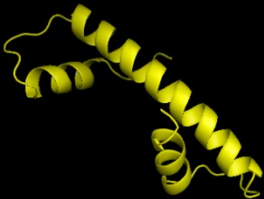

Supplement: 40246_2012_14_MOESM3_ESM.pdf [file 40246_2012_14_MOESM3_ESM.pdf]

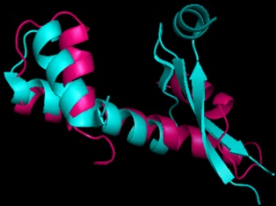

Supplement: 40246_2012_14_MOESM4_ESM.pdf [file 40246_2012_14_MOESM4_ESM.pdf]

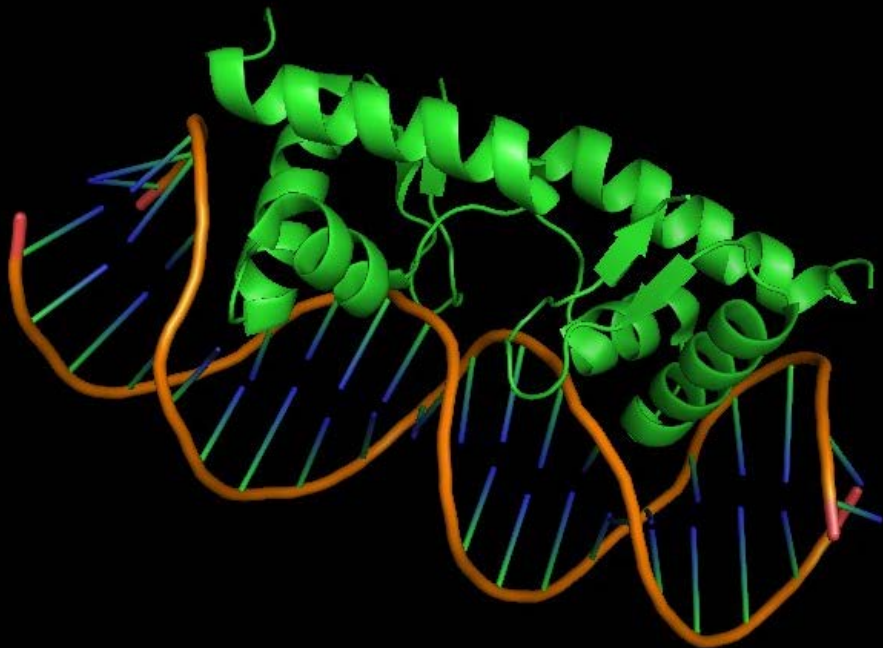

Supplement: 40246_2012_14_MOESM6_ESM.pdf [file 40246_2012_14_MOESM6_ESM.pdf]

A

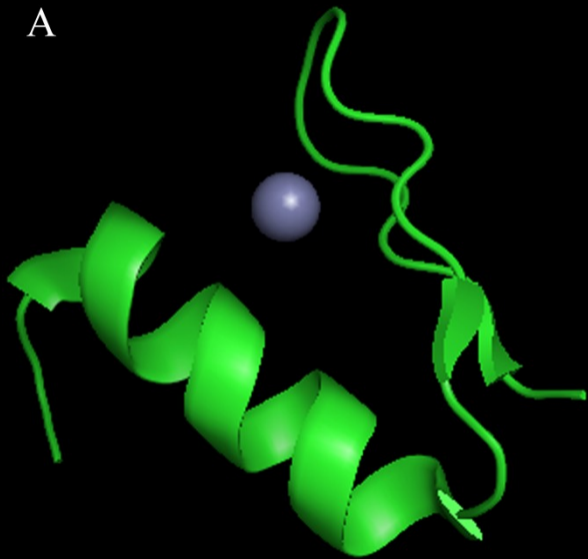

B

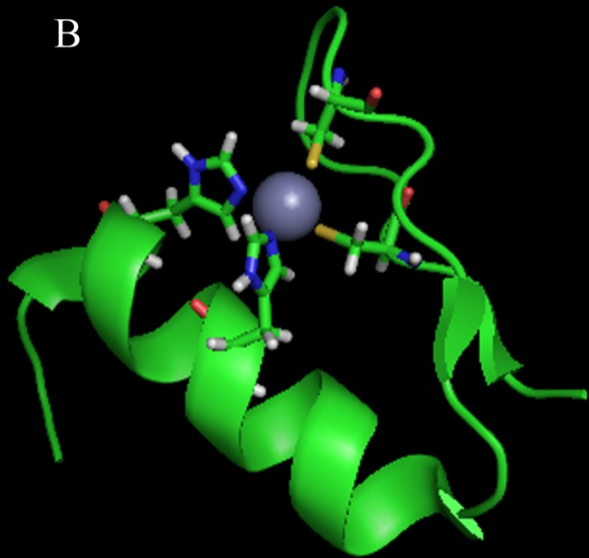

Supplement: 40246_2012_14_MOESM8_ESM.pdf [file 40246_2012_14_MOESM8_ESM.pdf]
